# Supplementary material for: Prevalence and Risk Factors of MASLD and Liver Fibrosis amongst the Penitentiary Population in Catalonia: The PRISONAFLD Study
Source: MDPI journal article supplement (doi:10.3390/jcm12237276), 2023-11-24
Supplement: s1 [file s1]

### **Supplementary Procedures:**

VCTE quality criteria: We considered reliable those VCTE explorations with an interquartile range/median (IQR/M) ratio  $<0.30$  and at least 10 valid individual measurements.

ELF score: We measured hyaluronic acid (HA), procollagen III N-terminal propeptide (PIIINP), and tissue inhibitor of matrix metalloprotease-1 (TIMP-1) and the ELF score using an Advia Centaur XP (Siemens Healthcare, Erlangen, Germany).

Genetic analysis: DNA was extracted from serum samples by the MagNa Pure 24 system. The *rs738409 PNPLA3* and *rs58542926 TM6SF2* SNPs were assessed by allele-specific genotyping techniques with real-time polymerase chain reaction (qPCRr) and fluorescent resonance energy transfer (FRET) specific probes and melting peaks analysis (Light SNIp assay) on a capillary-based thermocycler.

**Supplementary Table S1. Baseline characteristics according to the presence of MASLD amongst inmates with metabolic syndrome.**

| Variables                           | Overall MetS<br>N=196 | MASLD<br>N=97    | Non-MASLD<br>N=104 | p-value |
|-------------------------------------|-----------------------|------------------|--------------------|---------|
| Age (years)                         | 52.0±11.5             | 53.3±12.8        | 50.8±10.2          | 0.12    |
| Male sex, n (%)                     | 177 (90.3)            | 82 (89.1)        | 95 (91.3)          | 0.60    |
| Origin, n (%)                       |                       |                  |                    |         |
| Europe                              | 137 (69.9)            | 66 (71.7)        | 71 (68.3)          | 0.59    |
| Latin-America                       | 28 (14.3)             | 12 (13.0)        | 16 (15.4)          | 0.64    |
| BMI (kg/m <sup>2</sup> )            | 29.2 (26.3-32.3)      | 29.6 (27.2-34.1) | 28.9 (26.0-31.7)   | 0.08    |
| Obesity, n (%)                      | 99 (51.3)             | 51 (56.7)        | 48 (46.6)          | 0.16    |
| Waist circumference (cm)            | 108 (100-114)         | 110 (103-120)    | 105 (98-111)       | <0.001  |
| T2D, n (%)                          | 98 (50.0)             | 49 (53.3)        | 49 (47.1)          | 0.39    |
| HBP, n (%)                          | 130 (66.3)            | 64 (69.6)        | 66 (63.5)          | 0.36    |
| Dyslipidemia, n (%)                 | 123 (62.8)            | 65 (70.7)        | 58 (55.8)          | 0.031   |
| HIV, n (%)                          | 10 (6.1)              | 4 (5.3)          | 6 (6.7)            | 0.72    |
| AST (U/L)                           | 21±7                  | 22±7             | 20±7               | 0.15    |
| ALT (U/L)                           | 24±13                 | 25±13            | 23±11              | 0.19    |
| AP (UI/L)                           | 86±29                 | 87±259           | 85±29              | 0.70    |
| GGT (UI/L)                          | 34±27                 | 36±23            | 32±19              | 0.22    |
| Fasting glucose (mg/dL)             | 125±64                | 139±77           | 112±44             | 0.004   |
| Cholesterol (mg/dL)                 | 181±46                | 188±51           | 174±41             | 0.035   |
| Triglycerides (mg/dL)               | 197±113               | 222±135          | 176±84             | 0.007   |
| Creatinine (mg/dL)                  | 0.90±0.25             | 0.87±0.17        | 0.92±0.30          | 0.21    |
| Platelet count (10 <sup>9</sup> /L) | 258±69                | 261±64           | 255±72             | 0.57    |
| Liver stiffness (kPa)               | 6.3±3.3               | 7.1±4.1          | 5.6±2.1            | 0.001   |
| CAP (dB/m)                          | 276±59                | 329±36           | 229±28             | <0.001  |
| FIB-4 index                         | 1.00±0.57             | 1.00±0.52        | 1.00±0.61          | 0.91    |
| Fatty Liver Index                   | 75±19                 | 81±17            | 70±21              | <0.001  |
| ELF score*                          | 9.5±0.7               | 9.6±0.8          | 9.5±0.8            | 0.79    |
| PNPLA3 risk alleles**               | 14 (53.8)             | 8 (57.1)         | 6 (50.0)           | 0.71    |
| TM6SF2 risk alleles**               | 2 (7.7)               | 1 (7.1)          | 1 (8.3)            | 0.91    |

\*Data from 67 inmates. \*\*Data from 26 inmates. Qualitative variables were analyzed by  $\chi^2$  and expressed as n (%). t-Student test was applied for quantitative variables with normal distribution and presented as mean  $\pm$  standard deviation, whilst non-normal quantitative variables were assessed by Mann-Whitney U test and represented as median (interquartile range).

Abbreviations: BMI, Body mass index; CAP, controlled attenuation parameter; HBP, high blood pressure; HIV, human immunodeficiency virus; T2D, type 2 diabetes, ELF, Enhanced Liver Fibrosis.

**Supplementary Table S2. Baseline characteristics according to the presence of estimated significant fibrosis by vibration-controlled transient elastography.**

| Variables                               | LS < 8 kPa<br>N=540 | LS ≥ 8 kPa<br>N=106 | p-value |
|-----------------------------------------|---------------------|---------------------|---------|
| Age (years)                             | 47.8±12.2           | 49.1±11.6           | 0.32    |
| Male sex, n (%)                         | 480 (88.9)          | 98 (92.5)           | 0.27    |
| Origin, n (%)                           |                     |                     |         |
| Europe                                  | 336 (62.2)          | 74 (69.8)           | 0.13    |
| Latin-American                          | 107 (19.8)          | 16 (15.1)           | 0.25    |
| BMI (kg/m <sup>2</sup> )                | 28.0 (25.4-31.1)    | 30.0 (25.8-34.1)    | 0.005   |
| Obesity (≥30 kg/m <sup>2</sup> ), n (%) | 188 (36.1)          | 51 (50.0)           | 0.008   |
| Waist circumference (cm)                | 99 (91-108)         | 105 (96-115)        | 0.001   |
| T2D, n (%)                              | 109 (20.2)          | 31 (29.2)           | 0.038   |
| HBP, n (%)                              | 219 (40.6)          | 46 (43.4)           | 0.58    |
| Dyslipidemia, n (%)                     | 345 (64.0)          | 71 (67.0)           | 0.55    |
| MASLD, n (%)                            | 158 (29.3)          | 61 (57.5)           | <0.001  |
| HIV, n (%)                              | 23 (4.8)            | 11 (12.8)           | 0.004   |
| HCV, n (%)                              | 54 (10.9)           | 13 (13.0)           | 0.53    |
| AST (U/L)                               | 22±7                | 24±11               | 0.18    |
| ALT (U/L)                               | 23±13               | 27±18               | 0.052   |
| GGT (U/L)                               | 31±23               | 41±38               | 0.008   |
| Fasting glucose (mg/dL)                 | 103±60              | 113±54              | 0.13    |
| Cholesterol (mg/dL)                     | 187±44              | 184±45              | 0.53    |
| Triglycerides (mg/dL)                   | 145±87              | 154±97              | 0.35    |
| Creatinine (mg/dL)                      | 0.90±0.44           | 0.90±0.26           | 0.96    |
| Platelet count (10 <sup>9</sup> /L)     | 250±63              | 249±68              | 0.81    |
| Liver stiffness (kPa)                   | 5.1±1.23            | 13.1±11.3           | <0.001  |
| XL probe, n (%)                         | 268 (49.6)          | 57 (53.8)           | 0.43    |
| CAP (dB/m)                              | 249±59              | 285±70              | <0.001  |
| FIB-4 index                             | 1.00±0.54           | 1.02±0.60           | 0.75    |
| Fatty Liver Index                       | 58±26               | 67±27               | 0.002   |
| ELF score*                              | 9.3±0.8             | 9.9±0.8             | 0.002   |

|                       |           |          |      |
|-----------------------|-----------|----------|------|
| PNPLA3 risk alleles** | 27 (44.3) | 7 (38.9) | 0.68 |
| TM6SF2 risk alleles** | 6 (9.8)   | 2 (11.1) | 0.87 |

\*Data from 238 inmates. \*\*Data from 79 inmates. Qualitative variables were analyzed by  $\chi^2$  and expressed as n (%). t-Student test was applied for quantitative variables with normal distribution and presented as mean  $\pm$  standard deviation, whilst non-normal quantitative variables were assessed by Mann-Whitney U test and represented as median (interquartile range).

Abbreviations: BMI, Body mass index; CAP, controlled attenuation parameter; HBP, high blood pressure; HIV, human immunodeficiency virus; HCV, Hepatitis C virus; T2D, type 2 diabetes, ELF, Enhanced Liver Fibrosis.

### Supplementary Table S3. Baseline characteristics according to the ELF score threshold.

| Variables                           | ELF < 9.8<br>N=163 | ELF $\geq$ 9.8<br>N=75 | p-value |
|-------------------------------------|--------------------|------------------------|---------|
| Age (years)                         | 43.9 $\pm$ 11.1    | 51.4 $\pm$ 11.8        | <0.001  |
| Male sex, n (%)                     | 139 (85.3)         | 59 (78.7)              | 0.20    |
| BMI (kg/m <sup>2</sup> )            | 28.9 $\pm$ 4.7     | 30.1 $\pm$ 7.3         | 0.21    |
| Obesity, n (%)                      | 60 (36.8)          | 31 (41.3)              | 0.50    |
| T2D, n (%)                          | 32 (19.6)          | 22 (29.3)              | 0.09    |
| HBP, n (%)                          | 56 (34.4)          | 33 (44.0)              | 0.15    |
| Dyslipidemia, n (%)                 | 110 (67.5)         | 47 (62.7)              | 0.46    |
| MASLD, n (%)                        | 54 (33.1)          | 30 (40.0)              | 0.30    |
| HIV, n (%)                          | 7 (4.7)            | 6 (9.0)                | 0.21    |
| AST (U/L)                           | 22 $\pm$ 7         | 22 $\pm$ 11            | 0.70    |
| ALT (U/L)                           | 23 $\pm$ 13        | 23 $\pm$ 18            | 0.86    |
| GGT (U/L)                           | 28 $\pm$ 18        | 32 $\pm$ 31            | 0.33    |
| Glucose (mg/dL)                     | 104 $\pm$ 39       | 113 $\pm$ 55           | 0.16    |
| Cholesterol (mg/dL)                 | 191 $\pm$ 46       | 186 $\pm$ 45           | 0.40    |
| Triglycerides (mg/dL)               | 143 $\pm$ 93       | 155 $\pm$ 102          | 0.35    |
| Platelet count (10 <sup>9</sup> /L) | 250 $\pm$ 64       | 250 $\pm$ 75           | 0.96    |
| Liver stiffness (kPa)               | 5.4 $\pm$ 1.7      | 6.9 $\pm$ 5.1          | 0.017   |
| CAP (dB/m)                          | 258 $\pm$ 58       | 264 $\pm$ 61           | 0.48    |
| FIB-4 index                         | 0.94 $\pm$ 0.48    | 1.10 $\pm$ 0.71        | 0.09    |
| Fatty Liver Index                   | 54 $\pm$ 27        | 61 $\pm$ 25            | 0.057   |

Qualitative variables were analyzed by  $\chi^2$  and expressed as n (%). t-Student test was applied for quantitative variables with normal distribution and presented as mean  $\pm$  standard deviation.

Abbreviations: BMI, Body mass index; CAP, controlled attenuation parameter; HBP, high blood pressure; HIV: human immunodeficiency virus; T2D, type 2 diabetes.

**Supplementary Table S4. Baseline characteristics according to the presence of high-risk alleles of PNPLA3 and TM6SF2 genes.**

| Variables                | PNPLA3                 |                           | p-value | TM6SF2                   |                            | p-value |
|--------------------------|------------------------|---------------------------|---------|--------------------------|----------------------------|---------|
|                          | rs738409<br>CC<br>N=45 | rs738409<br>CG/GG<br>N=34 |         | rs58542926<br>CC<br>N=71 | rs58542926<br>TC/TT<br>N=8 |         |
| Age (years)              | 48.1±13.6              | 48.5±12.1                 | 0.89    | 49.2±12.8                | 40.7±11.8                  | 0.09    |
| Male sex, n (%)          | 42 (93.3)              | 30 (88.2)                 | 0.43    | 64 (90.1)                | 8 (100)                    | 0.35    |
| Origin, n (%)            |                        |                           |         |                          |                            |         |
| Europe                   | 27 (60.0)              | 16 (47.1)                 | 0.25    | 40 (56.3)                | 3 (37.5)                   | 0.31    |
| Latin-America            | 7 (15.6)               | 11 (32.4)                 | 0.07    | 15 (21.1)                | 3 (37.5)                   | 0.29    |
| BMI (kg/m <sup>2</sup> ) | 28.5±5.4               | 29.0±4.3                  | 0.60    | 28.8±5.0                 | 27.6±4.0                   | 0.52    |
| Obesity, n (%)           | 12 (26.7)              | 15 (44.1)                 | 0.10    | 26 (36.6)                | 1 (12.5)                   | 0.17    |
| T2D, n (%)               | 12 (26.7)              | 9 (26.5)                  | 0.98    | 18 (25.4)                | 3 (37.5)                   | 0.46    |
| HBP, n (%)               | 17 (37.8)              | 16 (47.1)                 | 0.40    | 29 (40.8)                | 4 (50)                     | 0.61    |
| Dyslipidemia, n (%)      | 26 (57.8)              | 23 (67.6)                 | 0.37    | 46 (64.8)                | 3 (37.5)                   | 0.13    |
| MASLD, n (%)             | 14 (31.4)              | 14 (41.2)                 | 0.35    | 26 (36.6)                | 2 (25)                     | 0.51    |
| HIV, n (%)               | 1 (2.4)                | 5 (16.7)                  | 0.033   | 4 (6.2)                  | 2 (33.3)                   | 0.022   |
| AST (U/L)                | 22±7                   | 23±11                     | 0.56    | 23±10                    | 23±8                       | 0.95    |
| ALT (U/L)                | 25±15                  | 27±14                     | 0.49    | 26±15                    | 23±12                      | 0.60    |
| GGT (U/L)                | 36±36                  | 31±17                     | 0.49    | 35±31                    | 26±6                       | 0.33    |
| Glucose (mg/dL)          | 99±23                  | 100±32                    | 0.82    | 98±19                    | 112±66                     | 0.57    |
| Cholesterol (mg/dL)      | 186±49                 | 183±37                    | 0.75    | 186±45                   | 171±25                     | 0.33    |
| Triglycerides (mg/dL)    | 126±72                 | 153±87                    | 0.13    | 138±83                   | 128±42                     | 0.73    |
| Liver stiffness (kPa)    | 7.2±5.5                | 6.1±1.9                   | 0.28    | 6.8±4.5                  | 6.6±2.5                    | 0.90    |
| CAP (dB/m)               | 253±65                 | 264±62                    | 0.48    | 260±65                   | 236±49                     | 0.31    |
| FIB-4 index              | 1.17±0.80              | 1.10±0.69                 | 0.73    | 1.14±0.70                | 1.22±1.15                  | 0.78    |
| Fatty Liver Index        | 53±27                  | 62±25                     | 0.13    | 58±26                    | 51±24                      | 0.46    |

Qualitative variables were analyzed by  $\chi^2$  and expressed as n (%). t-Student test was applied for quantitative variables with normal distribution and presented as mean  $\pm$  standard deviation. Abbreviations: BMI, Body mass index; CAP, controlled attenuation parameter; HBP, high blood pressure; HIV: human immunodeficiency virus; T2D, type 2 diabetes.
